# Supplementary material for: Use and Influence of Social Media on the Private Practice of Plastic Surgeons in Saudi Arabia
Source: PubMed Central journal article supplement — Plast Reconstr Surg Glob Open. 2023 May 22;11(5):e5012. doi: 10.1097/GOX.0000000000005012 (PMC10287126; doi:10.1097/gox.0000000000005012), 2023-05-22
Supplement: gox-11-e5012-s001.pdf [file gox-11-e5012-s001.pdf]

# The Social Media Use Among Saudi Plastic Surgeons and Its Impact on Their Private Practice

Questionnaire

## Demographic Data:

**1. Age [Open-ended]**

**2. Gender**

- A. Male
- B. Female

**3. Residency Training program**

- A- Saudi
- B- French
- C- Canadian
- D- American
- E- German
- F- Other (Please specify)

**4. Fellowships:**

- A- Aesthetic
- B- Burn
- C- Craniofacial
- D- Hand Surgery
- E- Microsurgery
- F- Pediatric plastic surgery
- G- Breast

**5. How many years have you been in practice post-residency or fellowship training?**

- A- 0-5 years
- B- 6-10 years
- C- 11-15 years
- D- 16-20 years
- E- 21-25 years
- F- > 25 years

**6. Region of practice:**

- A. Central
- B. Western
- C. Eastern
- D. Southern
- E. Other [Please mention]

**7. Primary practice setting:**

- A. Private practice (solo or group)
- B. Academic
- C. Non-academic hospital employed

D. Other (corporate or multispecialty group)

**8. What percentage of your practice is cosmetic surgery?**

- A. 0-20%
- B. 21-40%
- C. 41-60%
- D. 61-80%
- E. 81-100%

**9. What percentage of your practice is reconstructive Surgery?**

- A. 0-20%
- B. 21-40%
- C. 41-60%
- D. 61-80%
- E. 81-100%

**Use of Social Media Among Plastic Surgeons Related Questions**

**10. Do you currently use social media platforms (e.g., Facebook, Instagram, Snapchat, etc.) in your practice?**

- a. Yes
- b. No
- c. In process of creating social media presence
- d. Previously had social media presence but have since removed

**11. Which social media platforms do you use in your practice? (select all that apply)**

- a. I do not use social media in my practice
- b. Facebook
- c. Instagram
- d. Snapchat
- e. Real Self
- f. LinkedIn
- g. YouTube
- h. Vimeo
- i. Twitter
- j. Pinterest
- k. Google+
- l. Other: \_\_\_\_\_

**12. Who manages your business social media? (check all that apply)**

- a. You
- b. Staff
- c. Family
- d. Other
- e. N/A

**13. What is the main reason for using social media in your practice? (select all that apply)**

- a. I do not use social media in my practice
- b. Practice expansion

- c. Brand creation
- d. Education
- e. Create an online presence

**14. What percentage of your practice may be attributed to social media referrals?**

- a. I do not use social media in my practice
- b. <10%
- c. 10-20%
- d. 20-30%
- e. 30-40%
- f. 40-50%
- g. 50-60%
- h. 60-70%
- i. 70-80%
- j. 80-90%
- k. >90%

**15. How would you describe your practice size?**

- a. Single surgeon
- b. Two surgeon
- c. Group practice, 3 or more surgeons

**16. Do you feel that the use of social media in plastic surgery is overall positive for the field?**

- a. Strongly agree
- b. Agree
- c. Neutral
- d. Disagree
- e. Strongly disagree

**17. Do you feel that the use of social media in plastic surgery improves the image of the field?**

- a. Strongly agree
- b. Agree
- c. Neutral
- d. Disagree
- e. Strongly disagree

**18. Do you feel that the use of social media in plastic surgery worsens the image of the field?**

- a. Strongly agree
- b. Agree
- c. Neutral
- d. Disagree
- e. Strongly disagree

**19. Do you feel patients respond positively to social media by plastic surgery practices?**

- a. Strongly agree
- b. Agree
- c. Neutral
- d. Disagree
- e. Strongly disagree

**20. Do you feel patients are more likely to undergo plastic surgery when exposed to plastic surgery on social media?**

- a. Strongly agree
- b. Agree
- c. Neutral
- d. Disagree
- e. Strongly disagree

**21. Do you feel patients are more likely to prefer a plastic surgeon with a social media presence?**

- a. Strongly agree
- b. Agree
- c. Neutral
- d. Disagree
- e. Strongly disagree
