# Supplementary material for: Use and Influence of Social Media on the Private Practice of Plastic Surgeons in Saudi Arabia
Source: PubMed Central journal article supplement — Plast Reconstr Surg Glob Open. 2023 May 22;11(5):e5012. doi: 10.1097/GOX.0000000000005012 (PMC10287126; doi:10.1097/gox.0000000000005012), 2023-05-22
Supplement: gox-11-e5012-s002.pdf [file gox-11-e5012-s002.pdf]

Patients are more likely to undergo plastic surgery when exposed to plastic surgery on social media

Patients are more likely to prefer a plastic surgeon with a social media presence

Patients respond positively to social media by plastic surgery practices

The use of social media in plastic surgery is overall positive for the field

The use of social media in plastic surgery improves the image of the field

The use of social media in plastic surgery worsens the image of the field

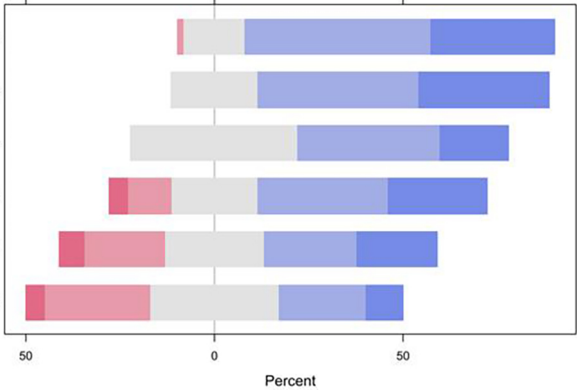

Strongly disagree Disagree Neutral Agree Strongly agree
